# Supplementary material for: New theoretical insights into high-coordination-number complexes in actinides-centered borane
Source: Royal Society of Chemistry journal article supplement (doi:10.1039/d0nr01955k), 2020-01-01
Supplement: d0nr01955k1.pdf [file d0nr01955k1.pdf]

## New theoretical insight into high coordination number complexes in actinides-centered borane

Shu-Xian Hu,<sup>\*1,2,3</sup> Peng Zhang,<sup>2</sup> Wenli Zou,<sup>3</sup> Ping Zhang<sup>4</sup>

<sup>1</sup> School of mathematics and physics, University of Science and Technology Beijing, Beijing 100083.

<sup>2</sup> Beijing Computational Science Research Center, Beijing 100193, China

<sup>3</sup> Institute of Modern Physics, Northwest University, and Shaanxi Key Laboratory for Theoretical Physics Frontiers, Xi'an, 710127, China.

<sup>4</sup> Laboratory of Computational Physics, Institute of Applied Physics and Computational Mathematics, Beijing 100088, China.

Corresponding author, E-mail: [hushuxian@csrc.ac.cn](mailto:hushuxian@csrc.ac.cn)

**Table S1.** The multiplicities, the relative energies ( $\Delta E$ , kcal/mol) compared with the most stable multiplicity isomer and the reaction energies (RE, kcal/mol) of  $An + B_{24} \rightarrow AnB_{24}$  for  $AnB_{24}$

| structure | State          | RE      | $\Delta E_{pbe}$ | $\Delta E_{b3lyp}$ |
|-----------|----------------|---------|------------------|--------------------|
| Th        | <sup>1</sup> A | -157.08 | 0.00             | 0.00               |
|           | <sup>3</sup> A | -145.3  | 13.35            | 20.38              |
|           | <sup>5</sup> A | -128.94 | 31.27            | 41.80              |
| Pa        | <sup>2</sup> A | -193.55 | 0.00             | 0.00               |
|           | <sup>4</sup> A | -181.6  | 13.71            | 21.29              |
|           | <sup>6</sup> A | -161.99 | 35.11            | 41.73              |
| U         | <sup>1</sup> A | -173.06 | 1.28             | 19.75              |
|           | <sup>3</sup> A | -172.66 | 0.00             | 0.00               |
|           | <sup>5</sup> A | -162.71 | 12.69            | 61.61              |
| Np        | <sup>2</sup> A | -143.61 | 7.00             | 8.19               |
|           | <sup>4</sup> A | -150.89 | 0.00             | 0.00               |
|           | <sup>6</sup> A | -136.39 | 16.45            | 28.19              |
|           | <sup>8</sup> A | -118.76 | 35.3             | 49.14              |
| Pu        | <sup>1</sup> A | -128.88 | 15.13            | 42.69              |
|           | <sup>3</sup> A | -137.65 | 6.36             | 16.09              |
|           | <sup>5</sup> A | -144.01 | 0.00             | 0.00               |
|           | <sup>7</sup> A | -133.72 | 10.29            | 8.86               |
| Am        | <sup>2</sup> A | -26.97  | 37.76            | 33.40              |
|           | <sup>4</sup> A | -48.84  | 17.30            | 15.05              |
|           | <sup>6</sup> A | -65.66  | 0.00             | 0.00               |
|           | <sup>8</sup> A | -51.57  | 15.39            | 9.53               |
| Cm        | <sup>1</sup> A | -52.48  | 48.5             | 98.13              |
|           | <sup>3</sup> A | -73.97  | 27.75            | 22.66              |
|           | <sup>5</sup> A | -100.53 | 1.01             | 6.30               |
|           | <sup>7</sup> A | -101.33 | 0.00             | 0.00               |

**Table S2.** The bond length ( $\text{\AA}$ ) of An-B in  $\text{AnB}_{24}$  at the PBE/TZ2P level of theory.

| An-B | Th    | Pa    | U     | Np    | Pu    | Am    | Cm    |
|------|-------|-------|-------|-------|-------|-------|-------|
| 1    | 2.676 | 2.635 | 2.628 | 2.596 | 2.633 | 2.642 | 2.645 |
| 2    | 3.085 | 3.035 | 2.997 | 2.979 | 2.972 | 2.969 | 3.030 |
| 3    | 2.748 | 2.713 | 2.708 | 2.732 | 2.724 | 2.730 | 2.713 |
| 4    | 2.693 | 2.622 | 2.562 | 2.608 | 2.596 | 2.593 | 2.604 |
| 5    | 2.676 | 2.635 | 2.628 | 2.596 | 2.633 | 2.642 | 2.645 |
| 6    | 3.085 | 3.035 | 2.997 | 2.979 | 2.972 | 2.969 | 3.030 |
| 7    | 2.861 | 2.765 | 2.671 | 2.646 | 2.694 | 2.705 | 2.772 |
| 8    | 2.693 | 2.622 | 2.562 | 2.608 | 2.596 | 2.593 | 2.604 |
| 9    | 2.789 | 2.781 | 2.785 | 2.734 | 2.742 | 2.755 | 2.760 |
| 10   | 2.693 | 2.622 | 2.562 | 2.608 | 2.596 | 2.593 | 2.604 |
| 11   | 2.861 | 2.765 | 2.671 | 2.646 | 2.694 | 2.705 | 2.772 |
| 12   | 2.779 | 2.730 | 2.696 | 2.723 | 2.680 | 2.676 | 2.682 |
| 13   | 2.861 | 2.765 | 2.671 | 2.646 | 2.694 | 2.705 | 2.772 |
| 14   | 3.085 | 3.035 | 2.997 | 2.979 | 2.972 | 2.969 | 3.030 |
| 15   | 2.779 | 2.730 | 2.696 | 2.723 | 2.680 | 2.676 | 2.682 |
| 16   | 2.789 | 2.781 | 2.785 | 2.734 | 2.742 | 2.755 | 2.760 |
| 17   | 2.748 | 2.713 | 2.708 | 2.732 | 2.724 | 2.730 | 2.713 |
| 18   | 2.748 | 2.713 | 2.708 | 2.732 | 2.724 | 2.730 | 2.713 |
| 19   | 2.676 | 2.635 | 2.628 | 2.596 | 2.633 | 2.642 | 2.645 |
| 20   | 2.676 | 2.635 | 2.628 | 2.596 | 2.633 | 2.642 | 2.645 |
| 21   | 2.748 | 2.713 | 2.708 | 2.732 | 2.724 | 2.730 | 2.713 |
| 22   | 2.861 | 2.765 | 2.671 | 2.646 | 2.694 | 2.705 | 2.772 |
| 23   | 3.085 | 3.035 | 2.997 | 2.979 | 2.972 | 2.969 | 3.030 |
| 24   | 2.693 | 2.622 | 2.562 | 2.608 | 2.596 | 2.593 | 2.604 |
| Ave. | 2.808 | 2.754 | 2.718 | 2.715 | 2.722 | 2.726 | 2.747 |

**Table S3.** The multiplicities and the relative energies ( $\Delta E$ , kcal/mol) compared with the most stable multiplicity isomer for  $\text{AnB}_{24}\text{H}_{24}$ .

| An | State        | $\Delta E_{\text{pbe}}$ | $\Delta E_{\text{DLPNO-CCSD(T)}}$ |
|----|--------------|-------------------------|-----------------------------------|
| Th | $^1\text{A}$ | 0.00                    | 0.00                              |
|    | $^3\text{A}$ | 24.00                   | 29.01                             |
| Pa | $^2\text{A}$ | 0.00                    | 0.00                              |
|    | $^4\text{A}$ | 46.81                   | 55.37                             |
| U  | $^1\text{A}$ | 0.00                    | 0.00                              |
|    | $^3\text{A}$ | 20.49                   | 32.98                             |
|    | $^5\text{A}$ | 49.59                   | 60.92                             |

|    |                |       |       |
|----|----------------|-------|-------|
| Np | <sup>2</sup> A | 14.37 | 48.57 |
|    | <sup>4</sup> A | 0.00  | 0.00  |
|    | <sup>6</sup> A | 33.23 | 75.25 |
| Pu | <sup>1</sup> A | 21.10 | 67.60 |
|    | <sup>3</sup> A | 12.47 | 27.17 |
|    | <sup>5</sup> A | 0.00  | 0.00  |
|    | <sup>7</sup> A | 12.47 | 19.53 |
| Am | <sup>2</sup> A | 38.76 | 48.70 |
|    | <sup>4</sup> A | 20.62 | 41.65 |
|    | <sup>6</sup> A | 0.00  | 0.00  |
|    | <sup>8</sup> A | 10.94 | 17.95 |
| Cm | <sup>1</sup> A | 53.06 | 98.55 |
|    | <sup>3</sup> A | 54.39 | 77.04 |
|    | <sup>5</sup> A | 23.34 | 66.02 |
|    | <sup>7</sup> A | 0.00  | 0.00  |

**Table S4.** The bond length (Å) of An-B in AnB<sub>24</sub>H<sub>24</sub> at the PBE/TZ2P level of theory.

| An-B | Th    | Pa    | U     | Np    | Pu    | Am    | Cm    |
|------|-------|-------|-------|-------|-------|-------|-------|
| 1    | 2.551 | 2.718 | 2.889 | 2.564 | 2.633 | 2.742 | 2.597 |
| 2    | 2.539 | 2.503 | 2.453 | 2.596 | 2.609 | 2.486 | 2.621 |
| 3    | 2.627 | 2.709 | 2.779 | 2.563 | 2.665 | 2.775 | 2.833 |
| 4    | 2.632 | 2.804 | 2.611 | 2.716 | 2.705 | 2.721 | 2.675 |
| 5    | 2.632 | 2.701 | 2.684 | 2.652 | 2.663 | 2.776 | 2.804 |
| 6    | 2.706 | 2.721 | 2.629 | 2.729 | 2.664 | 2.718 | 2.636 |
| 7    | 2.605 | 2.573 | 2.667 | 2.397 | 2.420 | 2.535 | 2.591 |
| 8    | 2.639 | 2.622 | 2.639 | 2.469 | 2.481 | 2.528 | 2.682 |
| 9    | 2.623 | 2.680 | 2.842 | 2.485 | 2.513 | 2.646 | 2.762 |
| 10   | 2.753 | 2.772 | 2.747 | 2.700 | 2.711 | 2.774 | 2.823 |
| 11   | 2.523 | 2.500 | 2.561 | 2.567 | 2.705 | 2.523 | 2.505 |
| 12   | 2.572 | 2.444 | 2.505 | 2.490 | 2.438 | 2.366 | 2.444 |
| 13   | 2.548 | 2.443 | 2.368 | 2.687 | 2.575 | 2.456 | 2.532 |
| 14   | 2.579 | 2.586 | 2.410 | 2.660 | 2.702 | 2.520 | 2.485 |
| 15   | 2.642 | 2.546 | 2.512 | 2.698 | 2.508 | 2.641 | 2.468 |
| 16   | 2.616 | 2.444 | 2.518 | 2.463 | 2.437 | 2.366 | 2.409 |
| 17   | 2.641 | 2.707 | 2.591 | 2.658 | 2.674 | 2.717 | 2.742 |
| 18   | 2.760 | 2.601 | 2.759 | 2.447 | 2.480 | 2.527 | 2.513 |
| 19   | 2.677 | 2.648 | 2.896 | 2.725 | 2.708 | 2.770 | 2.811 |
| 20   | 2.688 | 2.832 | 2.529 | 2.634 | 2.637 | 2.735 | 2.588 |
| 21   | 2.600 | 2.554 | 2.450 | 2.567 | 2.588 | 2.508 | 2.627 |

|         |       |       |       |       |       |       |       |
|---------|-------|-------|-------|-------|-------|-------|-------|
| 22      | 2.547 | 2.596 | 2.468 | 2.628 | 2.605 | 2.485 | 2.556 |
| 23      | 2.644 | 2.556 | 2.468 | 2.731 | 2.680 | 2.491 | 2.612 |
| 24      | 2.673 | 2.528 | 2.518 | 2.588 | 2.583 | 2.510 | 2.523 |
| Average | 2.626 | 2.616 | 2.604 | 2.601 | 2.599 | 2.597 | 2.618 |

**Table S5.** The multiplicities and the relative energies ( $\Delta E$ , kcal/mol) compared with the most stable multiplicity isomer for  $AnB_{24}H_{12}$ .

| structure | State | $\Delta E_{pbe}$ |
|-----------|-------|------------------|
| Th        | $^1A$ | 0.00             |
|           | $^3A$ | 9.10             |
| Pa        | $^2A$ | 0.00             |
|           | $^4A$ | 11.30            |
| U         | $^1A$ | 0.00             |
|           | $^3A$ | 40.55            |
|           | $^5A$ | 53.89            |
| Np        | $^2A$ | 45.74            |
|           | $^4A$ | 0.00             |
|           | $^6A$ | 28.46            |
| Pu        | $^1A$ | 40.16            |
|           | $^3A$ | 43.24            |
|           | $^5A$ | 38.23            |
|           | $^7A$ | 0.00             |
| Am        | $^2A$ | 67.71            |
|           | $^4A$ | 90.36            |
|           | $^6A$ | 16.70            |
|           | $^8A$ | 0.00             |
| Cm        | $^1A$ | 123.05           |
|           | $^3A$ | 114.90           |
|           | $^5A$ | 28.02            |
|           | $^7A$ | 0.00             |
|           | $^9A$ | 5.71             |

**Table S6.** The bond length ( $\text{\AA}$ ) of An-B for  $AnB_{24}H_{12}$  at the PBE/TZ2P level of theory

| An-B | Th    | Pa    | U     | Np    | Pu    | Am    | Cm    |
|------|-------|-------|-------|-------|-------|-------|-------|
| 1    | 3.945 | 2.691 | 3.809 | 2.864 | 3.297 | 2.726 | 2.623 |
| 2    | 2.563 | 2.440 | 2.446 | 2.668 | 2.687 | 2.871 | 2.797 |
| 3    | 2.645 | 2.558 | 2.431 | 2.596 | 2.506 | 2.787 | 2.638 |
| 4    | 2.908 | 2.722 | 2.828 | 2.507 | 2.530 | 2.819 | 2.755 |
| 5    | 2.666 | 2.601 | 2.351 | 2.661 | 2.382 | 2.811 | 3.235 |
| 6    | 2.790 | 2.717 | 2.619 | 3.560 | 2.880 | 2.556 | 3.635 |

|         |       |       |       |       |       |       |       |
|---------|-------|-------|-------|-------|-------|-------|-------|
| 7       | 2.921 | 2.492 | 2.773 | 3.641 | 2.860 | 2.746 | 3.650 |
| 8       | 2.556 | 2.202 | 2.405 | 3.145 | 2.819 | 2.639 | 3.350 |
| 9       | 2.980 | 2.544 | 2.928 | 3.742 | 3.543 | 2.936 | 3.304 |
| 10      | 2.625 | 2.309 | 2.521 | 2.637 | 2.644 | 2.815 | 3.622 |
| 11      | 2.761 | 2.460 | 2.586 | 3.504 | 2.514 | 4.656 | 2.694 |
| 12      | 3.983 | 2.468 | 3.805 | 3.943 | 2.644 | 4.118 | 2.528 |
| 13      | 2.888 | 2.380 | 2.753 | 2.531 | 3.049 | 4.100 | 2.718 |
| 14      | 2.873 | 3.355 | 2.665 | 2.776 | 2.641 | 4.391 | 2.595 |
| 15      | 3.514 | 3.832 | 3.545 | 2.786 | 3.104 | 3.872 | 2.897 |
| 16      | 3.266 | 2.556 | 3.211 | 2.627 | 2.715 | 4.163 | 2.745 |
| 17      | 3.146 | 2.978 | 2.871 | 2.792 | 2.315 | 3.361 | 3.705 |
| 18      | 3.418 | 3.074 | 3.515 | 2.291 | 2.841 | 3.875 | 4.443 |
| 19      | 2.983 | 2.991 | 2.765 | 2.616 | 2.668 | 3.862 | 3.630 |
| 20      | 3.776 | 3.080 | 3.703 | 2.355 | 2.619 | 3.560 | 4.023 |
| 21      | 3.812 | 2.671 | 2.862 | 2.920 | 2.385 | 4.037 | 4.204 |
| 22      | 4.175 | 3.649 | 3.342 | 2.610 | 2.836 | 3.458 | 3.861 |
| 23      | 3.650 | 3.626 | 3.016 | 2.406 | 2.769 | 3.722 | 3.997 |
| 24      | 3.540 | 3.796 | 2.824 | 3.763 | 2.629 | 3.807 | 4.037 |
| Average | 3.183 | 2.841 | 2.941 | 2.914 | 2.745 | 3.445 | 3.320 |

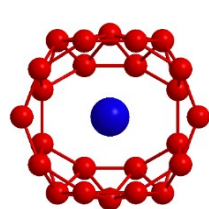

ISO1  ${}^3C_{2v}$  0.00

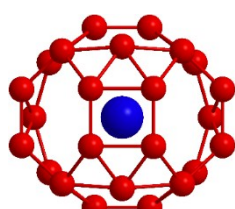

ISO2  ${}^3C_{2v}$  2.28

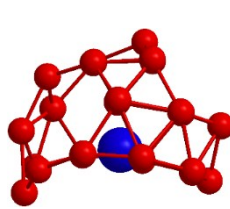

ISO3  ${}^3C_1$  8.34

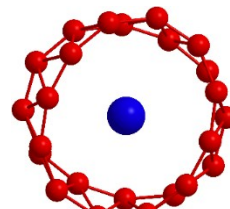

ISO4  ${}^3C_1$  10.90

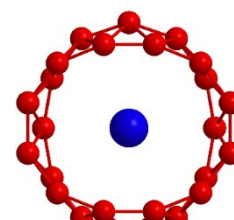

ISO5  ${}^3C_{2v}$  10.96

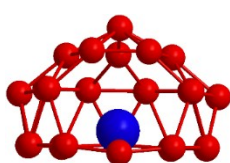

ISO6  ${}^3C_s$  11.29

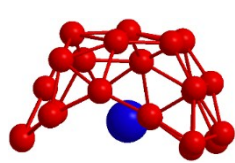

ISO7  ${}^3C_1$  11.48

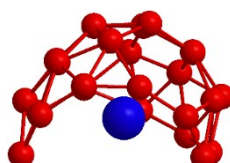

ISO8  ${}^3C_1$  16.42

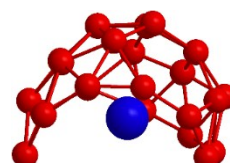

ISO9  ${}^1C_1$  21.88

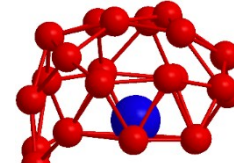

ISO10  ${}^3C_1$  27.17

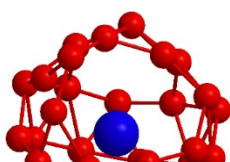

ISO11  ${}^3C_1$  32.90

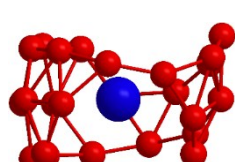

ISO12  ${}^3C_1$  34.36

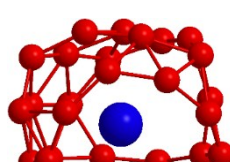

ISO13  ${}^5C_1$  32.52

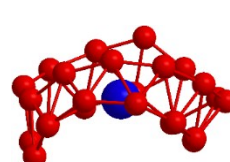

ISO14  ${}^3C_1$  41.99

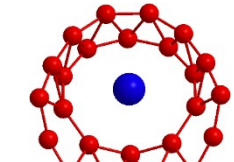

ISO15  ${}^3C_1$  42.29

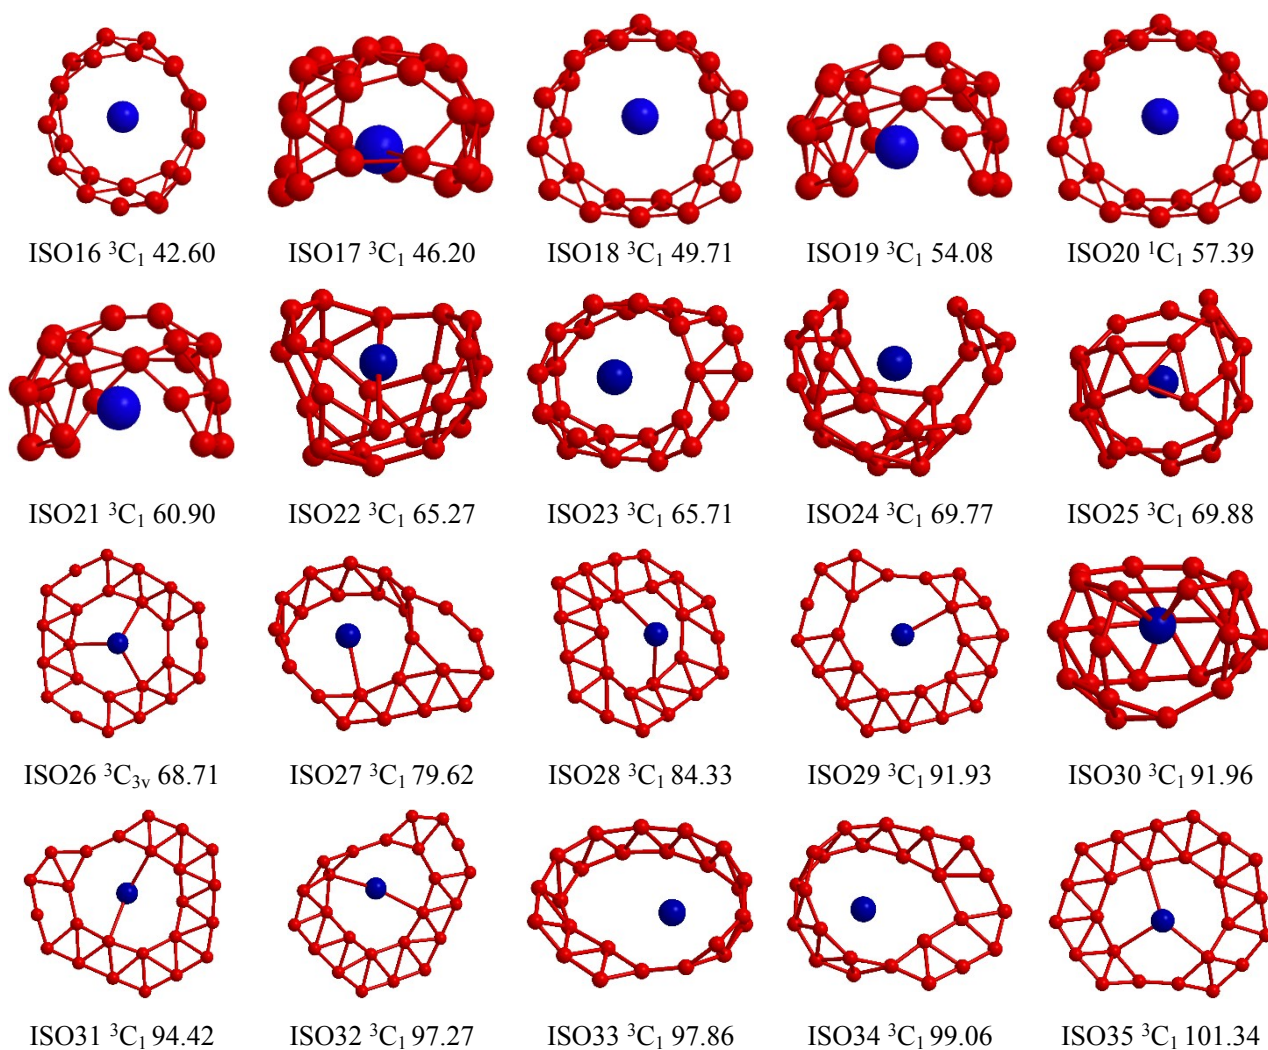

**Figure S1.** The global minimum and low-lying isomers of  $UB_{24}$ . Relative energies for the isomers of  $UB_{24}$  are given in kcal/mol at the PBE/TZ2P levels of theory.

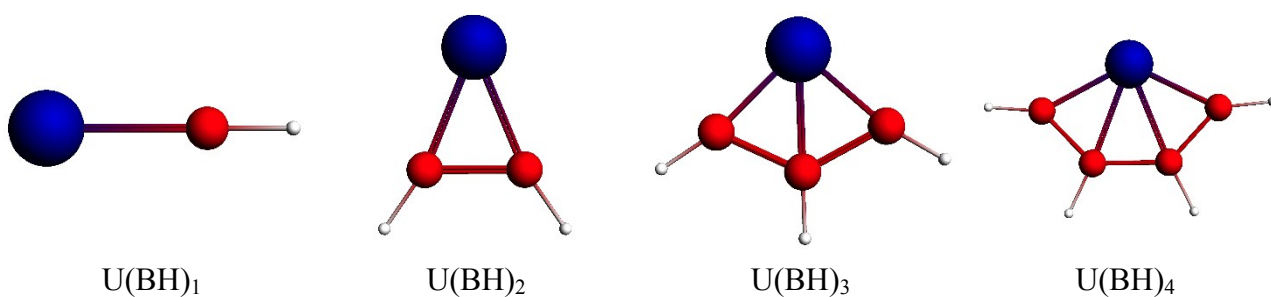

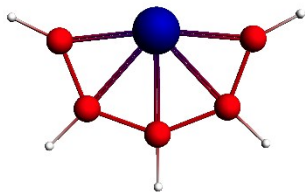

U(BH)<sub>5</sub>

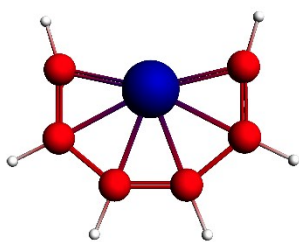

U(BH)<sub>6</sub>

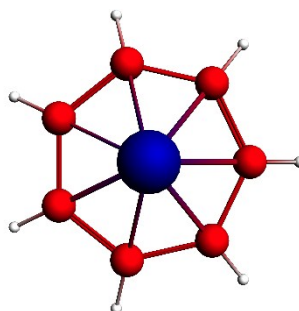

U(BH)<sub>7</sub>

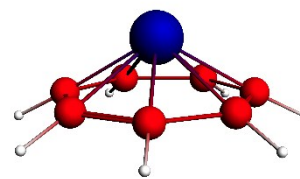

U(BH)<sub>8</sub>

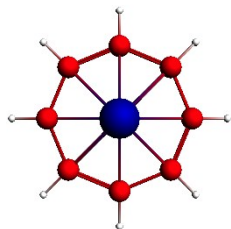

U(BH)<sub>9</sub>

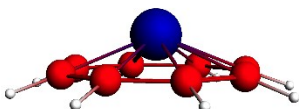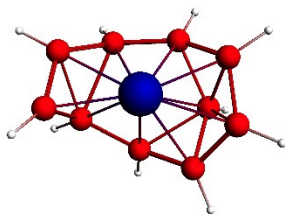

U(BH)<sub>10</sub>

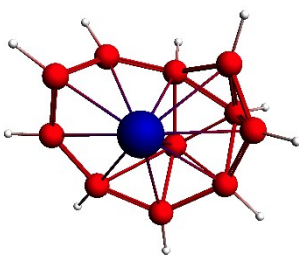

U(BH)<sub>11</sub>

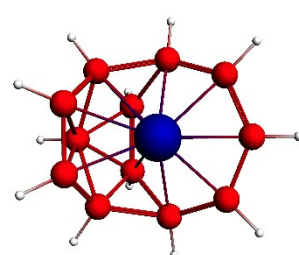

U(BH)<sub>12</sub>

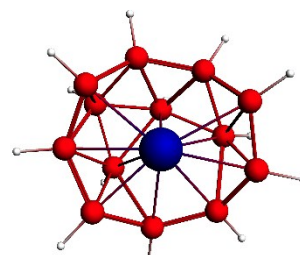

U(BH)<sub>13</sub>

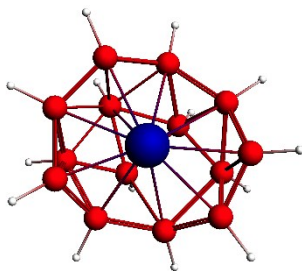

U(BH)<sub>14</sub>

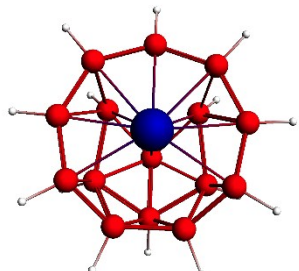

U(BH)<sub>15</sub>

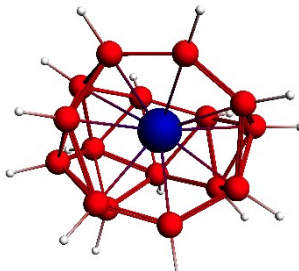

U(BH)<sub>16</sub>

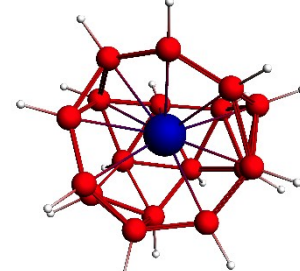

U(BH)<sub>17</sub>

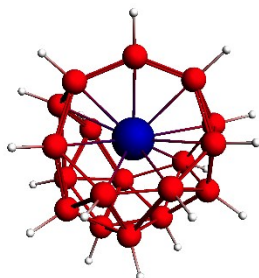

U(BH)<sub>18</sub>

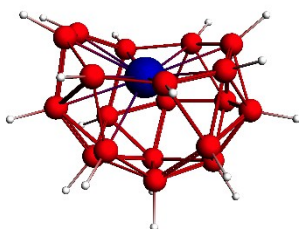

U(BH)<sub>19</sub>

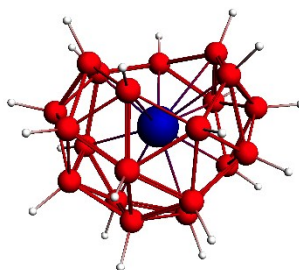

U(BH)<sub>20</sub>

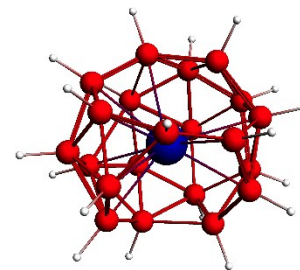

U(BH)<sub>21</sub>



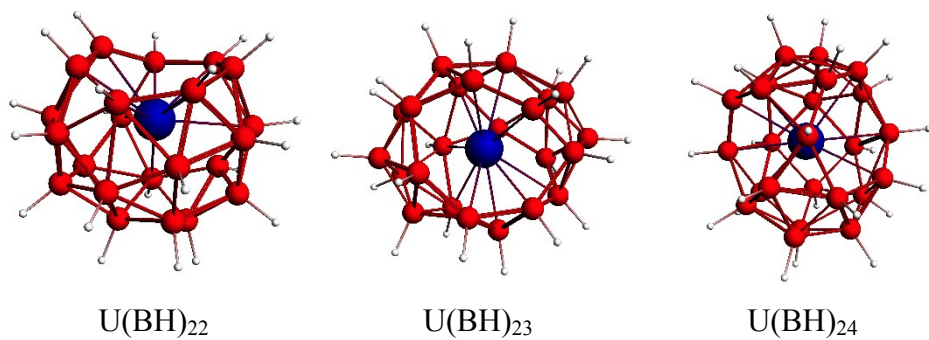

**Figure S2.** The optimized geometries for U(BH)<sub>n</sub> ( $n = 1$  to 24) at PBE/TZ2P level.

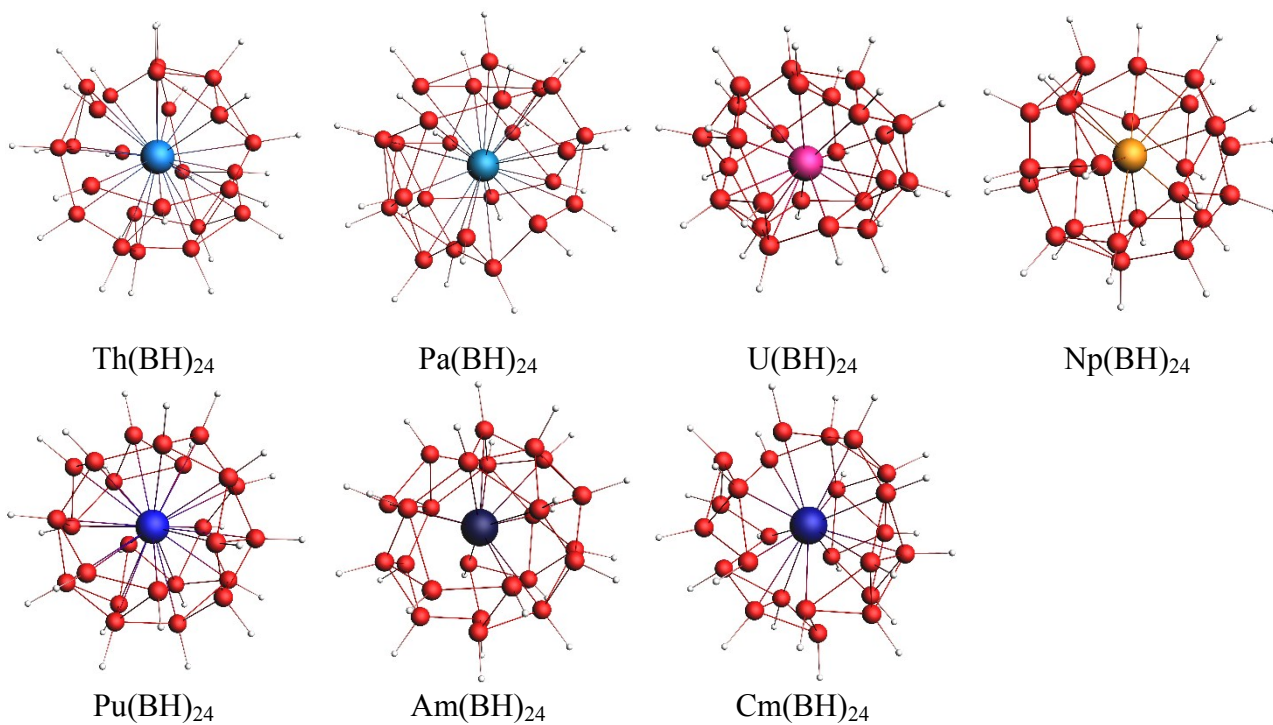

**Figure S3.** The optimized geometries for An(BH)<sub>24</sub> (An = Th to Cm) at PBE/TZ2P level.

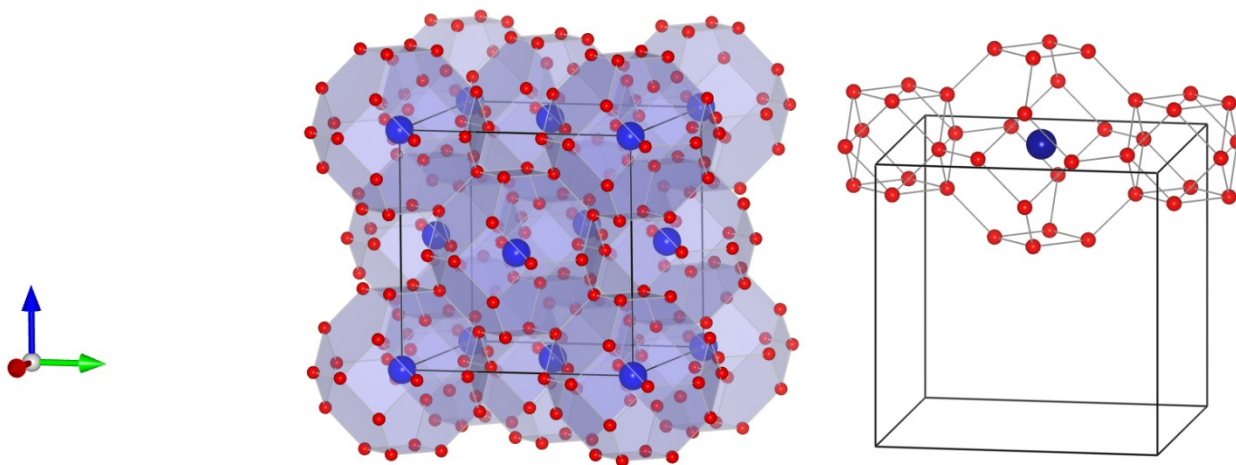



**Figure S4.** The fcc structure of PuB<sub>12</sub> (left); Boron polyhedral structure of PuB<sub>12</sub> (right) showing the large B<sub>24</sub> truncated octahedron, centered by the Pu atoms as well as the empty B<sub>12</sub> cuboctahedral polyhedra. Pu in dark blue and B in red.
